# Supplementary material
Source: PubMed Central journal article supplement (PMC9454652)
Supplement: NEJMoa2204919_appendix.pdf [file NEJMoa2204919_appendix.pdf]

## Supplementary Appendix

Supplement to: Arbel R, Wolff Sagy Y, Hoshen M, et al. Nirmatrelvir use and severe Covid-19 outcomes during the omicron surge. *N Engl J Med*. DOI: 10.1056/NEJMoa2204919

This appendix has been provided by the authors to give readers additional information about the work.

## Supplementary Material

### Contents

|                                                                                                              |    |
|--------------------------------------------------------------------------------------------------------------|----|
| Figure S1: SARS-cov2 Variants in Israel during the Study Period.....                                         | 2  |
| Table S1: Components of the Risk Score Model.....                                                            | 4  |
| Data Sources .....                                                                                           | 5  |
| Explanation on the Socio-Economic Status (SES) Measure.....                                                  | 6  |
| Table S2: Characteristics of the population affected by SARS-CoV-2 during the study period....               | 7  |
| Table S3: Association between participant characteristics and nirmatrelvir uptake* .....                     | 9  |
| Table S4: HR of Hospitalization in patients aged 65 years or older, from day 3 of follow-up<br>onwards ..... | 11 |
| Table S5: HR of Hospitalization in patients with <b>No</b> Prior Immunity, by age group.....                 | 12 |
| Table S6: HR of Hospitalization, in patients <b>With</b> Prior Immunity, by age group.....                   | 13 |
| Table S7: HR of Death due to Covid-19, by age group.....                                                     | 14 |
| References.....                                                                                              | 15 |

Figure S1: SARS-cov2 Variants in Israel during the Study Period

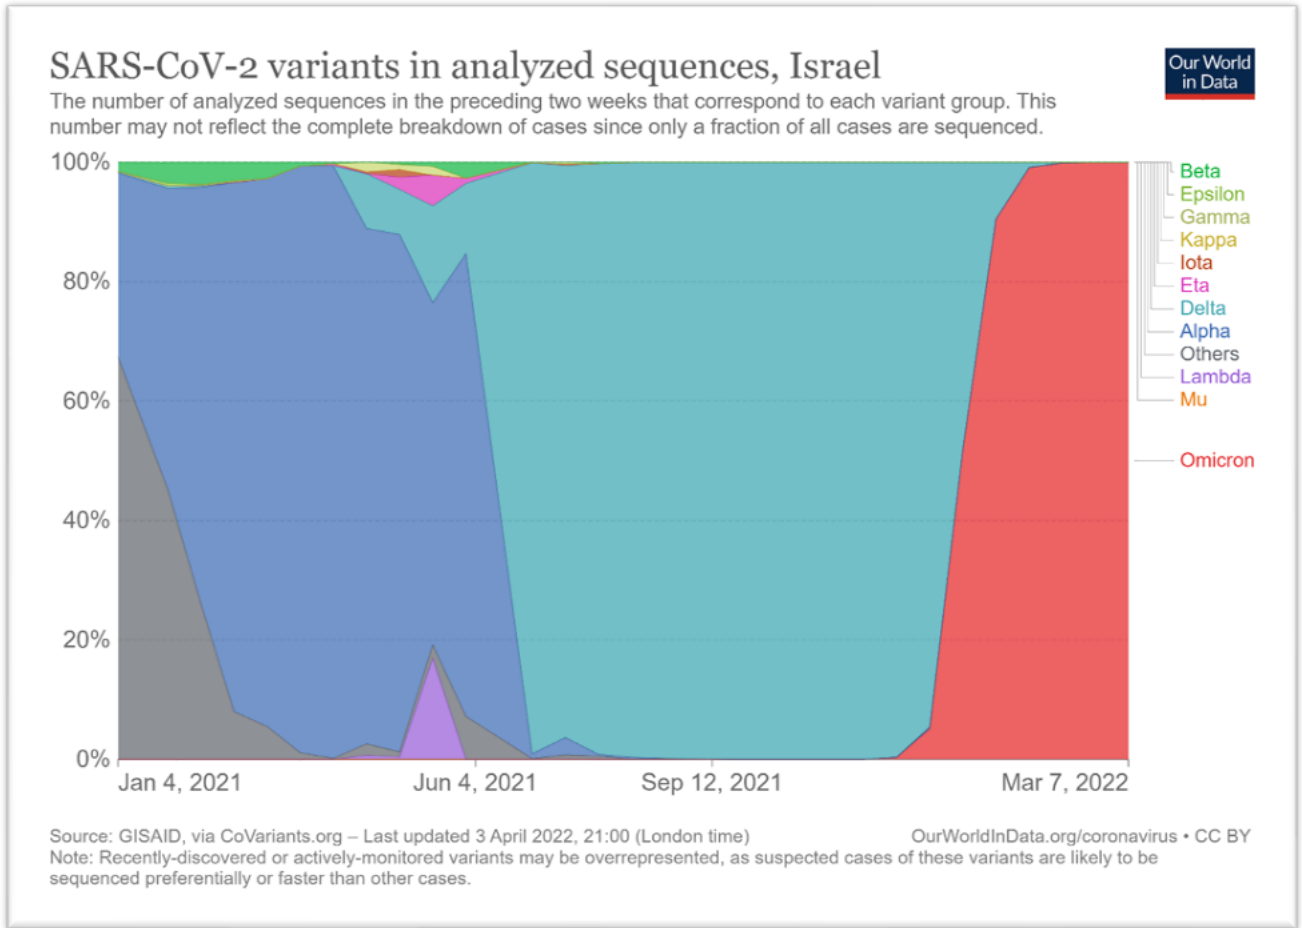

### Explanation on the Risk Score

Clalit Health Services (CHS) has used 'risk scores' based on predictive models throughout the pandemic and in a varying contexts as an integral part of its policy on how to prioritize patients for interventions in a resource-limited setting.

A manuscript describing the development and performance of a points-based model in CHS early in the pandemic and how it was implemented is available (1). The model was shown to perform extremely well in identifying the at risk population in a temporal test set, demonstrating high validity.

For example, at a threshold that identifies only 18% of the CHS population as having an elevated risk for severe Covid-19 the model manages to capture 92% of the individuals that ended up with severe Covid-19 or Covid-19-related death after infection

The landscape of the pandemic was dynamic and therefore such models had to be updated at a number of time points over the previous two years. The model specifically used in the prioritization of nirmatrelvir was very similar to that described in the manuscript above, with slight changes to the points criteria including:

- The addition of risk points for unvaccinated or partially vaccinated individuals
- Changes to the way points were designated based on an individual's age with individuals less than 60 receiving a 'penalty' and individuals over 70 receiving additional points
- The addition points for immunosuppressed individuals.

Table S1: Components of the Risk Score Model

| <b>Risk Criteria</b>                                                                                                       | <b>Risk Score</b>                         |
|----------------------------------------------------------------------------------------------------------------------------|-------------------------------------------|
| Age $\geq$ 70                                                                                                              | Adds 2 points                             |
| Age 50-59 inclusive                                                                                                        | Removes 1 point                           |
| Age 40-49 inclusive                                                                                                        | Removes 3 points                          |
| Unvaccinated or a single dose of vaccine                                                                                   | Adds 5 points                             |
| Immunosuppression* (including individuals between ages 12 and 40, who otherwise are not included in the intervention list) | Adds 7 points                             |
| Hospitalization in the past 3 years                                                                                        | Adds 1 point (Each hospitalization event) |
| COPD or $>10$ pack years                                                                                                   | Adds 1 point                              |
| BMI $> 30$                                                                                                                 | Adds 1 point                              |
| Heart disease, vascular disease or cerebrovascular disease                                                                 | Adds 1 point                              |
| Renal Disease                                                                                                              | Adds 1 point                              |
| Hepatic Disease                                                                                                            | Adds 1 point                              |
| Neurological Disease                                                                                                       | Adds 1 point                              |
| Active Malignancy                                                                                                          | Adds 1 point                              |
| Diabetes                                                                                                                   | Adds 1 point                              |
| Organ Transplant                                                                                                           | Adds 1 point                              |
| Bone Marrow Transplant or previous splenectomy or AIDS patient or HIV carrier                                              | Adds 1 point                              |
| Treatment at least twice with immunosuppressants in the last year or steroid treatment at least twice in the last year     | Adds 1 point                              |
| <b>Immunosuppression*</b>                                                                                                  |                                           |
| Bone marrow transplant                                                                                                     |                                           |
| Combined Anti-Retroviral Therapy (CAR-T)                                                                                   |                                           |
| Chronic Lymphocytic Leukemia                                                                                               |                                           |
| Acute Lymphocytic Leukemia                                                                                                 |                                           |
| Multiple Myeloma                                                                                                           |                                           |
| Non-Hodgkin Lymphoma                                                                                                       |                                           |
| Aplastic Anemia                                                                                                            |                                           |
| Hodgkin Lymphoma / Myelodysplastic Syndrome / Acute Myeloid Leukemia + hematological treatment                             |                                           |
| Myeloproliferative Disease + ruxolitinib treatment                                                                         |                                           |
| Rutixumab treatment                                                                                                        |                                           |

## Data Sources

Data in this study comes from the electronic medical records of Clalit Health Services (CHS). CHS is the largest of four integrated payer-provider health care organizations that provide mandatory health care coverage in Israel. CHS covers approximately 52% of the population of Israel (4.7 million persons). The dropout rate from CHS is 1- 2% yearly (2).

CHS pools the data from its many operational systems into a unified central data warehouse used for policy and research. This data repository includes detailed primary and secondary care information on hospitalizations, medications, laboratory results, and imaging tests. Due to the early adoption of electronic medical records and the low yearly dropout rate, CHS has good long-term follow-up of patients, ranging from the year 2000 (3).

Since the COVID-19 pandemic, the Israeli Ministry of Health (MOH) has centrally collected all COVID-19 related data. These include complete data on PCR testing, vaccination status, hospitalizations, and COVID-19 associated deaths, as reported daily to the MOH by all Israeli hospitals. The MOH transfers this data daily to the Israeli health funds (4). This allows integration of background medical information with vaccination status and COVID-19 related outcomes for the entire CHS patient population. The integrated data was used to generate the dataset for this study.

Data on Nirmatrelvir utilization was ascertained by CHS medical staff: A nurse in each CHS district was responsible for delivering nirmatrelvir therapy to the patients' homes and verifying adherence to the treatment regimen.

## Explanation on the Socio-Economic Status (SES) Measure

SES was based on the small statistical areas (SSA) used in the 2008 Israeli census. The SSAs contain 3000–4000 people and are created to maintain homogeneity in terms of the sociodemographic composition of the population (5). The Israeli Central Bureau of Statistics (CBS) utilized demography, education, employment, housing conditions, and income to define the SSAs, and these were grouped into 20 categories. This data was updated by the POINTS Location Intelligence Company (6) to improve the accuracy of the SES measure, using up-to-date sociodemographic, commercial, and housing data (7). The entire CHS population was grouped into ten categories, ranging from 1 (lowest) to 10 (highest).

Table S2: Characteristics of the population affected by SARS-CoV-2 during the study period

| Characteristic                         | Population at baseline (N= 1,164,902) |
|----------------------------------------|---------------------------------------|
| Age, years                             |                                       |
| Mean $\pm$ SD                          | 29.4 $\pm$ 21.2                       |
| Distribution- no. (%)                  |                                       |
| 40-64 yr                               | 1,075,756 (92)                        |
| $\geq$ 65 yr                           | 89, 146 (8)                           |
| Female sex - no. (%)                   | 642,920 (55)                          |
| Population sector- no. (%)             |                                       |
| General Jewish                         | 865,052 (74)                          |
| Ultra-Orthodox Jewish                  | 54,074 (5)                            |
| Arab                                   | 245,776 (21)                          |
| Socioeconomic status                   |                                       |
| Mean $\pm$ SD                          | 5.6 $\pm$ 1.9                         |
| Median (IQR)                           | 6 (2)                                 |
| <b>Clinical risk factors - no. (%)</b> |                                       |
| Obesity                                | 144,058 (12)                          |
| Hypertension                           | 92,775 (8)                            |
| Diabetes                               | 65,056 (6)                            |
| Current or former smoking              | 101,388 (9)                           |
| Immunosuppression                      | 43,415 (4)                            |
| Neurologic disease                     | 41,071 (3)                            |
| Current cancer disease                 | 19,884 (2)                            |
| Asthma                                 | 58,813 (5)                            |
| History of stroke                      | 15,099 (1)                            |
| Chronic hepatic disease                | 13,612 (1)                            |
| Chronic obstructive pulmonary disease  | 9,574 (1)                             |
| Chronic heart failure                  | 11,021 (1)                            |
| Chronic kidney failure                 | 12,662 (1)                            |
| Recent hospitalization                 | 155,102 (13)                          |



|                                         |              |
|-----------------------------------------|--------------|
| <b>Covid-19 immune status - no. (%)</b> |              |
| No prior immunity                       | 365,605 (31) |
| With prior immunity (overall)           | 799,297 (69) |

Table S3: Association between participant characteristics and nirmatrelvir uptake\*

| <b>Variable</b>                       | <b>Adjusted Hazard Ratio (95% CI)</b> |
|---------------------------------------|---------------------------------------|
| Age group                             |                                       |
| 40-64                                 | Reference                             |
| ≥65                                   | 1.94 (1.8-2.08)                       |
| Male Sex                              | 0.97 (0.9-1.03)                       |
| Population sector                     |                                       |
| General Jewish                        | Reference                             |
| Ultra-orthodox Jewish                 | 1.00 (0.85-1.18)                      |
| Arab                                  | 0.63 (0.55-0.71)                      |
| Socio-Economic Status**               | 1.16 (1.13-1.18)                      |
| <b>Clinical risk factors</b>          |                                       |
| Obesity                               | 1.34 (1.25-1.43)                      |
| Diabetes                              | 1.49 (1.39-1.60)                      |
| Asthma                                | 1.21 (1.08-1.35)                      |
| Hypertension                          | 1.08 (1.00-1.16)                      |
| Current or former smoking             | 1.12 (1.04-1.21)                      |
| Immunosuppression                     | 2.09 (1.93-2.26)                      |
| Neurologic disease                    | 1.22 (1.10-1.34)                      |
| Current cancer disease                | 1.97 (1.81-2.15)                      |
| Chronic hepatic disease               | 1.02 (0.89-1.17)                      |
| Chronic obstructive pulmonary disease | 1.53 (1.35-1.74)                      |
| Chronic heart failure                 | 1.13 (0.98-1.31)                      |
| Chronic kidney failure                | 1.00 (0.81-1.25)                      |

|                                        |                  |
|----------------------------------------|------------------|
| History of stroke                      | 1.16 (1.04-1.31) |
| Recent hospitalization                 | 1.46 (1.36-1.56) |
| History of organ transplant            | 0.86 (0.12-6.14) |
| Chronic immunological disease          | 1.94 (1.45-2.60) |
| History of TIA                         | 1.02 (0.87-1.20) |
| <b>Covid-19 immune status</b>          |                  |
| With prior immunity                    | Reference        |
| No prior immunity                      | 0.76 (0.68-0.84) |
| <b>Clalit Health Services District</b> |                  |
| Haifa                                  | reference        |
| Jerusalem                              | 1.37 (1.19-1.57) |
| Tel-Aviv                               | 1.57 (1.38-1.79) |
| Dan- Petach-Tikva                      | 1.37 (1.21-1.55) |
| Center                                 | 1.01 (0.89-1.14) |
| South                                  | 1.53 (1.35-1.74) |
| Sharon- Shomron                        | 0.88 (0.78-1.01) |
| North                                  | 1.90 (1.69-2.14) |
| Eilat                                  | 0.34 (0.17-0.69) |

\* The association between all covariates and nirmatrelvir uptake was estimated using a multivariate Cox proportional-hazards regression model. The higher the hazard ratio, the greater the association between the listed characteristic and nirmatrelvir uptake.

\*\* A hazard ratio of more than 1.00 indicates an association between a higher score for socioeconomic status and nirmatrelvir uptake.

Table S4: HR of Hospitalization in patients aged 65 years or older, from day 3 of follow-up onwards

| <b>Variable</b>                | <b>HR for Hospitalization Due to Covid-19 (95% CI)</b><br><b>≥65 Years of Age</b> |
|--------------------------------|-----------------------------------------------------------------------------------|
| Nirmatrelvir therapy           | 0.28 (0.15-0.55)                                                                  |
| Male Sex                       | 1.73 (1.44-2.09)                                                                  |
| Age (years)                    | 1.09 (1.07-1.10)                                                                  |
| Score for socioeconomic status | 0.90 (0.85-0.94)                                                                  |
| No prior immunity              | 6.60 (5.42-8.03)                                                                  |
| <b>Clinical risk factors</b>   |                                                                                   |
| Recent hospitalization         | 2.11 (1.73-2.56)                                                                  |
| Obesity                        | 1.09 (0.89-1.33)                                                                  |
| Diabetes                       | 1.34 (1.11-1.62)                                                                  |
| Chronic hepatic disease        | 1.01 (0.67-1.51)                                                                  |
| Neurologic disease             | 1.70 (1.37-2.11)                                                                  |
| Chronic heart failure          | 1.37 (1.04-1.81)                                                                  |
| COPD                           | 1.67 (1.26-2.21)                                                                  |
| History of stroke              | 1.13 (0.88-1.44)                                                                  |
| Chronic kidney failure         | 2.59 (1.86-3.60)                                                                  |

Table S5: HR of Hospitalization in patients with **No Prior Immunity**, by age group

| Variable                              | HR for Hospitalization Due to Covid-19 (95% CI) |                  |
|---------------------------------------|-------------------------------------------------|------------------|
|                                       | 40-64 Years of Age                              | ≥65 Years of Age |
|                                       | N=20,555                                        | N=3,318          |
| Number of events (event rate, %)      | 183 (0.9%)                                      | 277 (8.3%)       |
| Nirmatrelvir therapy                  | 0.23 (0.03-1.67)                                | 0.15 (0.04-0.60) |
| Male Sex                              | 1.87 (1.39-2.52)                                | 2.25 (1.76-2.88) |
| Age (years)                           | 1.08 (1.06-1.11)                                | 1.10 (1.08-1.11) |
| Score for socioeconomic status        | 0.99 (0.92-1.08)                                | 0.87 (0.81-0.94) |
| <b>Clinical risk factors</b>          |                                                 |                  |
| Recent hospitalization                | 2.63 (1.9-3.64)                                 | 1.10 (0.85-1.42) |
| Obesity                               | 1.68 (1.23-2.3)                                 | 1.52 (1.17-1.97) |
| Diabetes                              | 1.57 (1.08-2.27)                                | 1.33 (1.04-1.71) |
| Chronic hepatic disease               | 2.10 (1.27-3.45)                                | 1.11 (0.67-1.84) |
| Neurologic disease                    | 1.68 (1.01-2.79)                                | 1.24 (0.93-1.66) |
| Chronic heart failure                 | 2.45 (1.33-4.51)                                | 1.30 (0.91-1.86) |
| Chronic obstructive pulmonary disease | 1.66 (0.88-3.13)                                | 1.75 (1.22-2.51) |
| History of stroke                     | 2.11 (1.22-3.66)                                | 1.45 (1.07-1.97) |
| Chronic kidney failure                | 1.03 (0.32-3.29)                                | 1.55 (0.90-2.68) |

Table S6: HR of Hospitalization, in patients **With** Prior Immunity, by age group

| Variable                              | HR for Hospitalization Due to Covid-19 (95% CI) |                  |
|---------------------------------------|-------------------------------------------------|------------------|
|                                       | 40-64 Year of Age                               | ≥65 Year of Age  |
|                                       | N= 45,878                                       | N=39,503         |
| Number of events (event rate, %)      | 158 (0.3%)                                      | 505 (1.3%)       |
| Nirmatrelvir therapy                  | 1.13 (0.50-2.58)                                | 0.32 (0.17-0.63) |
| Male Sex                              | 1.04 (0.75-1.43)                                | 1.39 (1.16-1.66) |
| Age (years)                           | 1.03 (1.01-1.06)                                | 1.08 (1.07-1.10) |
| Score for socioeconomic status        | 1.04 (0.96-1.14)                                | 0.09 (0.85-0.94) |
| <b>Clinical risk factors</b>          |                                                 |                  |
| Recent hospitalization                | 4.35 (3.02-6.26)                                | 3.01 (2.47-3.66) |
| Obesity                               | 0.96 (0.69-1.34)                                | 0.90 (0.73-1.09) |
| Diabetes                              | 1.25 (0.87-1.79)                                | 1.39 (1.16-1.67) |
| Chronic hepatic disease               | 1.54 (0.93-2.56)                                | 1.11 (0.76-1.62) |
| Neurologic disease                    | 1.90 (1.22-2.96)                                | 1.76 (1.44-2.16) |
| Chronic heart failure                 | 2.44 (1.42-4.19)                                | 1.54 (1.19-1.99) |
| Chronic obstructive pulmonary disease | 2.83 (1.70-4.70)                                | 1.81 (1.39-2.35) |
| History of stroke                     | 1.57 (0.93-2.62)                                | 1.33 (1.06-1.67) |
| Chronic kidney failure                | 2.53 (1.17-5.47)                                | 1.88 (1.33-2.65) |

Table S7: HR of Death due to Covid-19, by age group

| Variable                              | HR for death Due to Covid-19 (95% CI) |                   |
|---------------------------------------|---------------------------------------|-------------------|
|                                       | 40-64 years of Age                    | ≥65 years of Age  |
| Nirmatrelvir therapy                  | 1.32 (0.16-10.75)                     | 0.21 (0.05-0.82)  |
| Male Sex                              | 1.63 (0.55-4.79)                      | 1.95 (1.41-2.71)  |
| Age (years)                           | 1.19 (1.06-1.33)                      | 1.12 (1.10-1.14)  |
| Score for socioeconomic status        | 0.97 (0.74-1.28)                      | 0.86 (0.78-0.94)  |
| No prior immunity                     | 5.65 (1.98-16.16)                     | 9.54 (6.87-13.25) |
| <b><i>Clinical risk factors</i></b>   |                                       |                   |
| Recent hospitalization                | 3.90 (1.17-13.01)                     | 1.62 (1.16-2.27)  |
| Smoking                               | 1.49 (0.48-4.64)                      | 1.48 (0.97-2.27)  |
| Diabetes                              | 0.88 (0.27-2.86)                      | 1.42 (1.03-1.94)  |
| Immunosuppression                     | 2.09 (0.60-7.31)                      | 2.23 (1.49-3.32)  |
| Active cancer                         | 2.51 (0.68-9.28)                      | 2.17 (1.43-3.29)  |
| Neurologic disease                    | 4.89 (1.61-14.82)                     | 2.01 (1.43-2.85)  |
| Chronic obstructive pulmonary disease | 1.84 (0.33-10.22)                     | 1.97 (1.22-3.19)  |
| History of stroke                     | 1.58 (0.40-6.27)                      | 1.79 (1.23-2.61)  |
| Chronic kidney failure                | 9.93 (2.48-39.75)                     | 2.88 (1.74-4.77)  |
| History of TIA                        | 8.41 (2.22-31.81)                     | 0.86 (0.45-1.61)  |
| Asthma                                | 1.89 (0.39-9.15)                      | 0.58 (0.30-1.11)  |
| <b><i>Area of residence</i></b>       |                                       |                   |
| Haifa                                 | <i>reference</i>                      | <i>reference</i>  |
| Tel-aviv district                     | 1.97 (0.5-7.81)                       | 1.89 (1.17-3.06)  |
| Central district                      | NA                                    | 1.72 (1.13-2.64)  |
| Sharon-Shomron district               | 1.03 (0.22-4.8)                       | 1.91 (1.24-2.95)  |

## References

1. Noa Dagan, Noam Barda, Dan Riesel, Itamar Grotto, Siegal Sadetzki, Ran Balicer. A score-based risk model for predicting severe COVID-19 infection as a key component of lockdown exit strategy. medRxiv 2020.05.20.20108571; doi: <https://doi.org/10.1101/2020.05.20.20108571>
2. Dagan N, Barda N, Kepten E, et al. BNT162b2 mRNA Covid-19 Vaccine in a Nationwide Mass Vaccination Setting. *N Engl J Med.* 2021;384(15):1412-1423. doi:10.1056/NEJMoa2101765.
3. Barda, N., Dagan, N., Ben-Shlomo, Y., Kepten, E., Waxman, J., Ohana, R., Hernán, M.A., Lipsitch, M., Kohane, I., Netzer, D. and Reis, B.Y., 2021. Safety of the BNT162b2 mRNA Covid-19 vaccine in a nationwide setting. *New England Journal of Medicine*, 385(12), pp.1078-1090.
4. Bar-On YM, Goldberg Y, Mandel M, et al. Protection of BNT162b2 Vaccine Booster against Covid-19 in Israel [published online ahead of print, 2021 Sep 15. *N Engl J Med.* 2021; NEJMoa2114255. doi:10.1056/NEJMoa2114255
5. Central Bureau of Statistics Israel. Characterization and classification of geographical units by the socio-economic level of the population 2008. Jerusalem, 2013.
6. Points location intelligence, 2021. <https://points.co.il/en/points-location-intelligence/>[Accessed Oct 3, 2021].
7. Weisband, Y.L., Kaufman-Shriqui, V., Sagy, Y.W., Krieger, M., Ahmad, W.A. and Manor, O., 2020. Area-level socio-economic disparity trends in nutritional status among 5–6-year-old children in Israel. *Archives of disease in childhood*, 105(11), pp.1049-1054.
